# Supplementary material
Source: PubMed Central journal article supplement (PMC5613948)
Supplement: NIHMS906801-supplement-suppl.pdf [file NIHMS906801-supplement-suppl.pdf]

## Rapid Screening of Primary Aldosteronism by a Novel Chemiluminescent Immunoassay

Ryo Morimoto, Yoshikiyo Ono, Yuta Tezuka, Masataka Kudo, Sachiko Yamamoto, Toshiaki Arai, Celso E. Gomez-Sanchez, Hironobu Sasano, Sadayoshi Ito and Fumitoshi Satoh

*Hypertension*. published online June 26, 2017;

*Hypertension* is published by the American Heart Association, 7272 Greenville Avenue, Dallas, TX 75231

Copyright © 2017 American Heart Association, Inc. All rights reserved.

Print ISSN: 0194-911X. Online ISSN: 1524-4563

The online version of this article, along with updated information and services, is located on the World Wide Web at:

<http://hyper.ahajournals.org/content/early/2017/06/26/HYPERTENSIONAHA.117.09078>

Data Supplement (unedited) at:

<http://hyper.ahajournals.org/content/suppl/2017/06/26/HYPERTENSIONAHA.117.09078.DC1>

**Permissions:** Requests for permissions to reproduce figures, tables, or portions of articles originally published in *Hypertension* can be obtained via RightsLink, a service of the Copyright Clearance Center, not the Editorial Office. Once the online version of the published article for which permission is being requested is located, click Request Permissions in the middle column of the Web page under Services. Further information about this process is available in the [Permissions and Rights Question and Answer](#) document.

**Reprints:** Information about reprints can be found online at:  
<http://www.lww.com/reprints>

**Subscriptions:** Information about subscribing to *Hypertension* is online at:  
<http://hyper.ahajournals.org/subscriptions/>

1 Online Data Supplement

2

3 Rapid screening of primary aldosteronism by a novel chemiluminescent immunoassay

4

5 Ryo Morimoto,<sup>1#</sup> Yoshikiyo Ono,<sup>1#</sup> Yuta Tezuka,<sup>1,2</sup> Masataka Kudo,<sup>1</sup> Sachiko Yamamoto,<sup>3</sup>

6 Toshiaki Arai,<sup>3</sup> Celso E Gomez-Sanchez,<sup>4</sup> Hironobu Sasano,<sup>5</sup> Sadayoshi Ito,<sup>1</sup> and

7 Fumitoshi Satoh<sup>1,2</sup>

8

9 <sup>1</sup>Division of Nephrology, Endocrinology and Vascular Medicine,

10 Department of Medicine, Tohoku University Hospital, Sendai, Miyagi, Japan;

11 <sup>2</sup>Division of Clinical Hypertension, Endocrinology and Metabolism,

12 Tohoku University Graduate School of Medicine, Sendai, Miyagi, Japan;

13 <sup>3</sup>Diagnostics Research Laboratories, Diagnostics Development Operations,

14 Diagnostics Division, Wako Pure Chemical Industries, Ltd., Osaka, Japan;

15 <sup>4</sup>Division of Endocrinology, G.V. (Sonny) Montgomery VA Medical Center and

16 University of Mississippi Medical Center, Jackson, MS, USA

17 <sup>5</sup>Department of Pathology, Tohoku University Hospital, Sendai, Miyagi, Japan;

18 # These authors contributed equally to this work.

19

20 Correspondence and reprint requests should be addressed to: Fumitoshi Satoh, M.D., Ph.D.

21 Division of Clinical Hypertension, Endocrinology and Metabolism,

22 Tohoku University Graduate School of Medicine,

23 1-1, Seiryomachi, Aoba-ku, Sendai, 980-8574, Japan

24 Email: fsatoh@med.tohoku.ac.jp

25 Telephone number: +81-22-717-7163 Fax number: +81-22-7117-7168

26

27 Methods

28

29 Diagnosis of primary aldosteronism (PA) and subtype differentiation

30 We measured both plasma aldosterone and renin activity by conventional radioimmunoassays  
31 under withdrawal of anti-hypertensive agents that interfere with renin-angiotensin-  
32 aldosterone system but in the presence of calcium channel blocker and/or alpha1 adrenergic  
33 antagonists prescribed to take adequate control of hypertension during the study period.  
34 Those patients who showed an aldosterone-over-renin activity ratio (ARR) equal to or higher  
35 than 20 ng/dL per ng/mL/h, at baseline and after a captopril challenge test, were diagnosed as  
36 PA.<sup>1</sup> Those who did not fulfil the diagnostic criterion described above were additionally  
37 screened for other secondary causes of hypertension, and finally diagnosed to have essential  
38 hypertension (EH). Patients who showed other causes of secondary hypertension, such as  
39 autonomous secretion of cortisol detected by overnight low dose (1mg) dexamethasone  
40 suppression test, paraganglioma, other endocrine causes, and renovascular diseases detected  
41 by ultrasonography and/or computed tomography scans, were excluded from the study. PA  
42 patients with a desire for surgery underwent adrenal venous sampling (AVS), and the patients  
43 diagnosed with unilateral hyperaldosteronism by AVS underwent laparoscopic  
44 adrenalectomy as previously reported.<sup>1-3</sup> Aldosterone-producing lesions in the resected  
45 adrenals were confirmed by pathological evaluation and immunohistochemistry of  
46 steroidogenic enzymes including CYP11B1/2, 3BHSD1/2, and CYP17A.<sup>4,5</sup>

47

48 Conventional radioimmunoassay of plasma aldosterone and active renin concentrations, and  
49 renin activity

50 Plasma aldosterone was measured by RIA using the commercially available SPAC-S  
51 Aldosterone Kit (Fujirebio Inc., Tokyo, Japan) and PRA was measured by RIA for  
52 angiotensin I using the commercially available Renin RIABEAD Kit (Fujirebio Inc.). Plasma  
53 active renin was measured using the commercially available Renin IRMA Kit (Fujirebio  
54 Inc.). Using each commercially available assay listed above, the analytical sensitivity of  
55 plasma aldosterone, renin activity and active renin concentrations was 2.5 ng/dL, 0.1 ng/mL/h  
56 and 2.0 pg/mL, respectively. Plasma samples for aldosterone, renin activity and active renin  
57 concentration were obtained with the patient in a recumbent position early in the morning  
58 after 30 minutes of bed rest. Plasma ACTH was measured by electro-chemiluminescent  
59 immunoassay using the commercially available ECLusys ACTH kit (Roche Diagnostics  
60 K.K., Tokyo) and serum cortisol was measured by chemiluminescent immunoassay using the  
61 commercially available Chemilumi ACS-E Cortisol Kit (Siemens Healthcare Diagnostics,  
62 Inc., Tokyo).

63

64 Description of the novel assay protocol

65 Accuraseed system is an automated immunoassay system for simultaneous measurement of  
66 plasma aldosterone concentration (PAC) and active renin concentration (ARC) (Wako Pure  
67 Chemical Industries, Ltd., Osaka, Japan). Accuraseed was developed using the newly  
68 developed magnetic particles called MAGRAPID (Japanese Unexamined Patent Application  
69 Publication No. 2016-105066, US 9,157,911 B2). Accuraseed, based on a chemiluminescent  
70 enzyme immunoassay, makes it possible to simultaneously measure PAC and ARC from a  
71 plasma sample, and the total assay time for both PAC and ARC is 10 minutes and 20  
72 seconds. Two assays, one for PAC and the other for ARC, are performed in parallel from a  
73 single specimen. The required time is defined as follows; it starts when centrifuged plasma  
74 sample is applied and it ends when assay result is provided from Accuraseed system, not  
75 including time for sample processing before assay.

76

77 aldosterone concentration

78 The aldosterone assay is designed as a competitive immunoassay format. For determination  
79 of PAC, we used a highly specific mouse anti-aldosterone monoclonal antibody (A2E11) <sup>6)</sup>  
80 and peroxidase-conjugated aldosterone. The assay protocol was as follows; 25  $\mu$ L of plasma  
81 were mixed with 50  $\mu$ L of reagent #1 including mouse anti-aldosterone monoclonal antibody  
82 and goat anti-mouse polyclonal antibody, immobilized onto the magnetic particles, and  
83 incubated for 180 seconds at 37 °C. After incubation, 50  $\mu$ L of reagent #2 including  
84 peroxidase-conjugated aldosterone were added and the mixture was incubated for 180  
85 seconds at 37 °C. After removing the unbound conjugate solution and washing the magnetic  
86 particles for 60 seconds, 50  $\mu$ L of reagent #3 including 8-amino-5-chloro-7-  
87 phenylpyrido[3,4]pyridazine-1,4-(2H,3H)dione sodium salt (L-012) as the highly sensitive  
88 luminescent reagent was mixed with 100  $\mu$ L of reagent #4 including hydrogen peroxide, to  
89 measure chemiluminescence. The amount of peroxidase-conjugated aldosterone bound to the  
90 magnetic particles is inversely proportional to the PAC in the sample, and then aldosterone in  
91 the sample is calculated from the calibration curve prepared with standard solutions.

92

93 active renin concentration

94 For determination of active renin concentration, we used two anti-renin monoclonal  
95 antibodies (Japanese patent No. 2877222); one binds to only renin (monoclonal antibody  
96 #11-6) and the other binds to renin and prorenin (monoclonal antibody #12-12). The assay  
97 protocol was as follows; 25  $\mu$ L of plasma were mixed with 50  $\mu$ L of reagent #1, including  
98 anti-renin monoclonal antibody (#12-12), which was immobilized onto the magnetic  
99 particles, and incubated for 180 seconds at 37 °C. After removing the mixed solution and  
100 washing the magnetic particles for 60 seconds, 50  $\mu$ L of reagent #2, including peroxidase-  
101 conjugated anti-active renin monoclonal antibody (#11-6), was added and the mixture was

102 incubated for 180 seconds at 37 °C. After removing reagent #2 and washing the magnetic  
103 particles for 60 seconds, 100 µL of reagent #3, including L-012 as high sensitive luminescent  
104 reagent, were mixed with 100 µL of reagent #4 including hydrogen peroxide, to measure  
105 chemiluminescence. The amount of the peroxidase-conjugated antibody bound to the  
106 magnetic particles increases in proportion to the ARC in the sample; ARC in the sample is  
107 calculated from the calibration curve prepared by using standard solutions.  
108

109 Effect of storage temperature on the ARC assay

110 Effect of storage temperature

111 Influence of storage temperature on stability of ARC measurement was analyzed as follows;  
112 5 plasma samples were employed and each sample was aliquoted into 7 test tubes. One of the  
113 seven aliquots per each plasma sample was measured by the ARC assay immediately (0h),  
114 and other six aliquots were stored at the following temperatures, on ice (0°C), 5°C or 26°C, and  
115 then applied to measurement after 1, 3, 6, 9, 12 and 24 hour of incubation. Each assay was  
116 performed in duplicate. The mean of measurements at each time point (1/3/6/9/12/24h) was  
117 compared to result of baseline sample (0h). Relative values were calculated as follows; %  
118 relative value = [each time point's mean observed value] / [baseline (0h) mean observed  
119 value].

120

121 Effect of freeze-thaw cycles

122 Influence of freeze-thaw cycles on the ARC measurement was analysed as follows; 3 plasma  
123 samples were employed and each sample was aliquoted into 4 test tubes. One of the four  
124 aliquots per each plasma sample was measured by the ARC assay immediately (0 cycle), and  
125 other three aliquots were stored -80°C, and then thawed using 20°C water bath to room  
126 temperature (meaning 1 cycle), and repeated this freeze-thaw processes three (3 cycle) and  
127 five times (5 cycle) before application to the ARC assay. Each assay was performed in  
128 duplicate. The mean of measurements at each cycle (1/3/5 cycle) was compared to result of  
129 baseline sample (0 cycle). Relative values were calculated as follows; % relative value =  
130 [each cycle's mean observed value] / [baseline (0 cycle) mean observed value].

131

132 Measurement of renin standard for comparison to preceding ARC assays

133 After development of the ARC assay including calibration process using human recombinant  
134 renin (human activated renin (GenBank Accession No. NM\_000537), amino acids 67-406  
135 with C-terminal HIS tag, Catalog#: 80200, Lot#: 120228, BPS Bioscience Inc., San Diego,  
136 CA), we assayed international standard of renin (WHO International Standard renin, human,  
137 NIBSC code: 68/356) for comparison to preceding ARC assays.

138 Bland-Altman plot analysis

139 Bland-Altman plot was performed to analyze agreement between two different assays and  
140 show a bias and limits of agreement with 95% confidence interval.

141

142 Concept and design of Accuraseed system

143 Accuraseed system was developed for both clinic and hospital use. For screening purpose of  
144 PA in clinic settings, on-site and faster availability of assay results might be a help in making  
145 clinical decision whether further workup is indicated or not. Additionally, in the hospital  
146 settings, this faster assay system might shorten waiting time needed to obtain results of  
147 confirmation tests and, if indicated, subsequent adrenal venous sampling, and time-saving  
148 effects provided by this assay system might be accumulated throughout the whole diagnostic  
149 processes from screening to lateralization. The Accuraseed auto-analyzer system is originally  
150 designed to fit relatively small space even in clinic settings and ready to provide clinically  
151 useful assays other than those of aldosterone and renin, especially in the field of thyroid  
152 medicine, cardiology and oncology, considering versatility in hospital settings.

153

154 Results

155

156 Laboratory validation of the novel assays for PAC and ARC

157 For the PAC and ARC assays, the limits of detection were 5.0 ng/dL and 0.1 pg/mL,  
158 respectively, as shown in Tables S1 and S2. Limits of quantification at 20% and 15%  
159 coefficient of variation were found to be 5.0 ng/dL and 0.1 pg/mL, respectively (Figure S1  
160 and S2). Similarly, analytical sensitivities were revealed to be 5.0 ng/dL and 0.1 pg/mL for  
161 the PAC and ARC assays, respectively. Assay ranges (defined as analytical sensitivity to  
162 upper limit of detection) were set to be 5.0-160.0 ng/dL and 0.1-500.0 pg/mL for PAC and  
163 ARC assays, respectively. The results of accuracy experiments are shown in Tables S3 and  
164 S4 for the PAC and ARC assays, respectively; those of intra- and inter-assay precision are  
165 shown in Tables S5 and S6 for PAC and ARC assays, respectively; and linearity of results  
166 obtained by PAC and ARC assays are shown in Tables S7 and S8, respectively. Detailed  
167 results of recovery, interference and cross-reactivity for PAC assay are shown in Tables S9,  
168 S10 and S11, respectively. Similarly, results of recovery and interference for the ARC assay  
169 are presented in Tables S12 and S13, respectively.

170

171 Sensitivity testing

172 The results of LoD are shown in Tables S1 and S2, and the results of LoQ are shown in  
173 Figures S1 and S2

174 aldosterone

175 LoD should be calculated by performing 21 measurements of Zero matrix and samples with  
176 very low concentrations (3 concentrations; samples may be diluted in a Zero matrix). LoD  
177 was the lowest concentration determined using the following condition:  $[Average - 2SD (Zero$   
178  $matrix)] > [Average + 2SD (low sample)]$

179 Four low level samples should be obtained for the determination of LoQ. These may be  
180 created by dilution of samples in a Zero matrix. Samples should be assayed ten times. LoQ  
181 was determined as the concentration corresponding to the 20% CV cut-off.

182 Renin (ARC)

183 LoD should be calculated by performing 21 measurements of Zero matrix and samples with  
184 very low concentrations (5 concentration; samples may be diluted in a Zero matrix). LoD was  
185 the lowest concentration determined using the following condition:  $[Average + 2SD (Zero$   
186  $matrix)] < [Average - 2SD (low sample)]$

187 Five low level samples should be obtained for the determination of LoQ. These may be  
188 created by dilution of samples in a Zero matrix. Samples should be assayed ten times. LoQ  
189 was determined as the concentration corresponding to the 15% CV cut-off.

190

191 Accuracy

192 The results of the accuracy are shown in Tables S3 and S4. Accuracy studies were performed  
193 using six samples (three plasma and three standards).

194

195 Precision

196 The results of the inter and intra-assay precision tests are shown in Tables S5 and S6.

197 Inter-assay precision studies were performed in 21 replicate measurements using plasma from  
198 3 patients.

199 Intra-precision studies were performed in duplicate using plasma from 2 patients (6 runs over  
200 15 days).

201

202

203 Linearity

204 The results of the linearity tests are shown in Tables S7 and S8. Two samples with a low and  
205 high concentration of aldosterone were assayed alongside the diluted samples using the  
206 aldosterone assays. Three samples with a low and high concentration of ARC were assayed  
207 alongside the diluted samples using the renin assays. Each dilution was tested in duplicate.  
208 The mean observed values were compared to the expected values. The OBS/EXP was  
209 calculated for the intermediate dilutions, to calculate the percent recovery, determined using  
210 the following formula:

$$211 \quad \% \text{ Recovery} = [\text{Mean observed value}] / [\text{Expected value}] \times 100$$

212

213 Recovery

214 The results of recovery tests are shown in Tables S9 and S12.

215 aldosterone

216 The study to assess spiking recovery by the aldosterone assay was performed by spiking 3  
217 EDTA plasma samples with the reference standard. The spike concentrations were three,  
218 giving a mean increase in Aldosterone concentration of 50.0 to 400.0pg/mL, respectively in  
219 the three samples. The control (0% spike) and spiked samples were run in triplicate. The  
220 samples were spiked and placed directly on the analyser for measurement.

221 Recovery was calculated as follows:

$$222 \quad \% \text{ Recovery} = [\text{Observed Recovery value} / \text{Expected Recovery value (Analyte added)}] \times 100$$

223 The Accuraseed Aldosterone assay was designed to have a minimum acceptable recovery of  
224 75-125 %.

225 renin (ARC)

226 The study to assess spiking recovery by the renin (ARC) assay was performed by spiking 3  
227 EDTA plasma samples with the reference standard. The spike concentrations were three,  
228 giving a mean increase in renin concentration of 2.0 to 100.0pg/mL, respectively in the three  
229 samples. The control (0% spike) and spiked samples were run in triplicate. The samples were  
230 spiked and placed directly on the analyser for measurement.

231 Recovery was calculated as follows:

$$232 \quad \% \text{ Recovery} = [\text{Observed Recovery value} / \text{Expected Recovery value (Analyte added)}] \times 100$$

233 The renin (ARC) assay was designed to have a minimum acceptable recovery of 80-120%.

234

235 Interference

236 The results of the interference are shown in Tables S10 and S13.

237 aldosterone



238 Interference testing was performed for the following substances: ascorbic acid, hemoglobin,  
239 bilirubin, bilirubin-conjugate, chyle and rheumatoid factor. To determine potential  
240 interference in the specific detection, two base plasma samples were spiked with the potential  
241 interferent at five concentrations. Control samples (blank) were spiked with a volume of  
242 relevant diluent equal to that of the spiked interferent. Spiked and control samples (blank)  
243 were then compared. The differences observed between the spiked and control sample values  
244 were examined and assessed according to acceptance criterion. The criterion for pass or fail  
245 of the assay as stated in the protocol was  $\leq 25\%$  concentration bias to the un-spiked sample.

246 Interference was calculated as follows:

247  $\% \text{ Interference} = [\text{Sample value (Interferent spiked)} / \text{Control Sample value (Blank)}] \times 100$

248 The aldosterone assay was designed to have a minimum acceptable interference of 75-125 %.

249 renin (ARC)

250 Interference testing was performed as already described for aldosterone. The criterion for  
251 pass or fail of the assay as stated in the protocol was  $\leq 20\%$  concentration bias to the un-  
252 spiked sample.

253 Interference was calculated as:

254  $\% \text{ Interference} = [\text{Sample value (Interferent spiked)} / \text{Control Sample value (blank)}] \times 100$

255 The rennin (ARC) assay was designed to have a minimum acceptable interference of 80-120  
256 %.

257

258 Cross-reactivity

259 aldosterone

260 The results of the cross-reactivity test are shown in Table S11

261 Cross-reactivity was defined as the point where the reduction in signal corresponds to 50%  
262 of the signal achieved in the absence of the analyte (B/Bo of 50%), as a percentage of the  
263 analyte concentration giving the same fall in signal

264  $\% \text{ Cross-reactivity} = [\text{ED}_{50} \text{ (ng/dL) aldosterone}] / [\text{ED}_{50} \text{ (ng/dL) compound}] \times 100$

265

266 Stock concentrations of the substances to be checked for cross-reactivity were prepared  
267 initially in an organic solvent. The stock solution of the cross-reactant was then spiked into  
268 the standard solution and subsequently diluted down serially to create a 5-point standard  
269 curve for each substance. Curves were run in the same experiment for comparison of  $\text{ED}_{50}$   
270 values of the potential cross-reactant against the  $\text{ED}_{50}$  of the aldosterone assay displacement  
271 curve.

272

273 Effect of storage temperature and freeze-thaw cycles on ARC assay

274 The results of storage temperature and freeze-thaw cycles are shown in Table S14 through  
275 S17 and Figure S3 through S6.

276

277 Measurement of renin standard for comparison to preceding ARC assays

278 The ARC assay showed that 1 international unit (IU) of WHO renin standard was equal to  
279 591 ng. Based on the measurement of WHO standard of renin, we also obtained unit  
280 conversion factor of 1.692 from pg/mL to  $\mu$ IU/mL.

281

282 Bland-Altman plot analysis

283 Bland-Altman plot analysis of PAC revealed a bias of -19.7 and the limits of agreement were  
284 -2.18 and -37.16 with 95% confidence interval when comparing the novel CLEIA and the  
285 conventional RIA (Figure S2A).

286 Bland-Altman plot analysis revealed a bias of 13.7, and the limits of agreement were 10.85  
287 and 16.55 with 95% confidence interval when CLEIA and LC-MS/MS of PAC were  
288 compared (Figure S2B).

289 Bland-Altman plot analysis between RIA and LC-MS/MS of PAC revealed a bias of 33.4  
290 with the limits of agreement of 15.23 and 51.51 with 95% confidence interval (Figure S2C).

291 Bland-Altman plot analysis of ARC revealed the bias of -0.97 and the limits of agreement  
292 were -1.087 and -0.8671 with 95% confidence interval when comparing CLEIA and the  
293 conventional RIA (Figure S2D).

294

295 Estimation of clinical benefit and cost in Accuraseed system

296 In our practice in Sendai, all assays using radioactive materials are performed in referral  
297 laboratory centers, away from our hospital. Thus, the waiting time for radioimmunoassay  
298 results ranges from three to five business days. While we assume that a total of four to five  
299 occasions of the measurement is necessary, i.e., one or two occasions in screening, two  
300 occasions in two confirmation tests, and one occasion in AVS, we could save at least 12-15  
301 days over the whole course of workup by introducing the rapid assay system.

302 Typical clinical scenario is expected as follows; a patient is referred to our institution with a  
303 positive screening test and blood chemistry results including electrolytes and renal function  
304 tests. Subsequently, at first visit, physicians make plan for confirmatory tests, usually two  
305 tests. While there used to be waiting time, 3-5 days per test, for results to come back when  
306 radioimmunoassays were employed, results of the faster assay system are available within the

307 same day, meaning immediate decision might be made whether next lateralization step is  
308 indicated or not. When adrenal venous sampling is performed, diagnosis on lateralization and  
309 subsequent indication for adrenalectomy can be made within the same day, also suggesting  
310 substantially shorter time from first visit to the final clinical decision.

311 Moreover, in settings of inpatient care, similar effects might be prominent in terms of  
312 reduction in the number of clinic visits and time-saving. When a patient with a positive  
313 screening test is referred and admitted to our center, two confirmatory tests and adrenal  
314 venous sampling could be performed in consecutive three days, because the faster assay  
315 system made it possible to decide immediately whether a next step or surgery is indicated or  
316 not within the day, suggesting duration of hospital stay for whole workup for PA might be  
317 substantially reduced, compared to era dependent on radioimmunoassays.

318 Finally, accumulated effects provided by shortening of the workup time in each case are  
319 expected to improve throughput of potential patients who are positive for screening and  
320 waiting for workup in PA centers, and synergistically increase the chance to diagnose patients  
321 who were otherwise undiagnosed and/or medically treated despite uncovered indication for  
322 surgical cure.

323 As far as cost is concerned, initial cost needed to introduce the new system was estimated to  
324 be approximately 16 million yen and running cost per test was decided to be approximately  
325 1300 and 1100 yen (measurements of PAC and ARC, respectively) in Japan's national  
326 healthcare service system. Assay costs to be paid by patient makes little difference between  
327 conventional radioimmunoassay and the new enzyme assay in Japan's national healthcare  
328 service system, meaning no additional cost per patient with introduction of the faster assay  
329 system.

330

331

332

### 333 References

334

- 335 1. Iwakura Y, Morimoto R, Kudo M, Ono Y, Takase K, Seiji K, Arai Y, Nakamura Y,  
336 Sasano H, Ito S, Satoh F. Predictors of decreasing glomerular filtration rate and  
337 prevalence of chronic kidney disease after treatment of primary aldosteronism: Renal  
338 outcome of 213 cases. *J Clin Endocrinol Metab.* 2014;99:1593-1598.
- 339 2. Iwakura Y, Ito S, Morimoto R, Kudo M, Ono Y, Nezu M, Takase K, Seiji K, Ishidoya S,  
340 Arai Y, Funamizu Y, Miki T, Nakamura Y, Sasano H, Satoh F. Renal resistive index  
341 predicts postoperative blood pressure outcome in primary aldosteronism. *Hypertension.*  
342 2016;67:654-660.

- 343 3. Satoh F, Morimoto R, Seiji K, Satani N, Ota H, Iwakura Y, Ono Y, Kudo M, Nezu M,  
344 Omata K, Tezuka Y, Kawasaki Y, Ishidoya S, Arai Y, Takase K, Nakamura Y,  
345 McNamara K, Sasano H, Ito S. PROGRESS IN PRIMARY ALDOSTERONISM: Is there  
346 a role for segmental adrenal venous sampling and adrenal sparing surgery in patients with  
347 primary aldosteronism? *Eur J Endocrinol.* 2015;173:465-477.
- 348 4. Ono Y, Nakamura Y, Maekawa T, Saulo J. A. Felizola, Morimoto R, Iwakura Y, Kudo  
349 M, Seiji K, Takase K, Arai Y, Celso E. Gomez-Sanchez, Ito S, Sasano H, Satoh F.  
350 Different expression of 11 $\beta$ -hydroxylase and aldosterone synthase between aldosterone-  
351 producing microadenomas and macroadenomas. *Hypertension.* 2014;64:438-444.
- 352 5. Nakamura Y, Kitada M, Satoh F, Maekawa T, Morimoto R, Yamazaki Y, Ise K, Gomez-  
353 Sanchez CE, Ito S, Arai Y, Dezawa M, Sasano H. Intratumoral heterogeneity of  
354 steroidogenesis in aldosterone-producing adenoma revealed by intensive double- and  
355 triple-immunostaining for CYP11B2/B1 and CYP17. *Mol Cell Endocrinol.* 2016;422:57-  
356 63.
- 357 6. Gomez-Sanchez CE, Foecking MF, Ferris MW, Chavarri MR, Uribe L, Gomez-Sanchez  
358 EP. The production of monoclonal antibodies against aldosterone. *Steroids.* 1987;49:581-  
359 587.

360 **Table S1.** Limit of detection in CLEIA of PAC.

| sample        | (CPS)   |          |          |           |
|---------------|---------|----------|----------|-----------|
|               | 0 pg/mL | 50 pg/mL | 75 pg/mL | 100 pg/mL |
| 1             | 556278  | 522638   | 481819   | 486993    |
| 2             | 570413  | 509682   | 505019   | 475918    |
| 3             | 581653  | 508379   | 495884   | 487489    |
| 4             | 565041  | 518878   | 488245   | 453194    |
| 5             | 559428  | 520852   | 505633   | 476671    |
| 6             | 568207  | 507232   | 487754   | 482728    |
| 7             | 557074  | 521782   | 504025   | 478575    |
| 8             | 553342  | 515424   | 483717   | 484343    |
| 9             | 560665  | 524126   | 479336   | 495881    |
| 10            | 552065  | 526536   | 507562   | 505416    |
| 11            | 548083  | 522161   | 484546   | 477261    |
| 12            | 548989  | 500419   | 506978   | 481149    |
| 13            | 571740  | 534819   | 497657   | 472539    |
| 14            | 556007  | 518977   | 513987   | 487883    |
| 15            | 545188  | 530980   | 516795   | 483351    |
| 16            | 544314  | 509890   | 489858   | 458871    |
| 17            | 549769  | 524062   | 507235   | 500366    |
| 18            | 557958  | 513750   | 499361   | 501496    |
| 19            | 549778  | 522943   | 506527   | 487342    |
| 20            | 565754  | 497098   | 505806   | 480633    |
| 21            | 565385  | 520166   | 511517   | 483507    |
| n             | 21      | 21       | 21       | 21        |
| average       | 558435  | 517657   | 499012   | 482934    |
| S.D.          | 9765    | 9493     | 11342    | 12500     |
| C.V.          | 1.7%    | 1.8%     | 2.3%     | 2.6%      |
| average+2S.D. | 577965  | 536643   | 521696   | 507934    |
| average-2S.D. | 538905  | 498671   | 476328   | 457934    |

361 CLEIA indicates chemiluminescent enzyme immunoassay; PAC, plasma aldosterone concentration.

362

363

364 **Table S2.** Limit of detection in CLEIA of ARC.

| sample        | (CPS)     |           |           |           |           |           |
|---------------|-----------|-----------|-----------|-----------|-----------|-----------|
|               | 0.0 pg/mL | 0.1 pg/mL | 0.2 pg/mL | 0.3 pg/mL | 0.5 pg/mL | 0.7 pg/mL |
| 1             | 1716      | 3249      | 5161      | 6392      | 9825      | 13517     |
| 2             | 1816      | 3321      | 4820      | 6336      | 9909      | 13722     |
| 3             | 1833      | 3207      | 5114      | 6242      | 9656      | 13521     |
| 4             | 1692      | 3390      | 4928      | 6207      | 9618      | 13320     |
| 5             | 1680      | 3266      | 4817      | 6265      | 9406      | 13593     |
| 6             | 1665      | 3279      | 4842      | 6349      | 9829      | 13530     |
| 7             | 1655      | 3219      | 4762      | 6211      | 9697      | 13200     |
| 8             | 1759      | 3357      | 4932      | 6340      | 9565      | 13124     |
| 9             | 1713      | 3210      | 5050      | 5984      | 9514      | 13317     |
| 10            | 1638      | 3272      | 4661      | 6118      | 9575      | 13163     |
| 11            | 1642      | 3343      | 4885      | 6489      | 9765      | 12866     |
| 12            | 1715      | 3245      | 5163      | 6534      | 10227     | 13317     |
| 13            | 1668      | 3455      | 5099      | 6289      | 9863      | 13609     |
| 14            | 1752      | 3240      | 4953      | 6660      | 9876      | 13155     |
| 15            | 1720      | 3310      | 4781      | 6383      | 9784      | 13419     |
| 16            | 1732      | 3226      | 4954      | 6588      | 9649      | 13394     |
| 17            | 1540      | 3256      | 4653      | 6190      | 10049     | 13208     |
| 18            | 1732      | 3182      | 4815      | 6679      | 10100     | 13008     |
| 19            | 1719      | 3197      | 4815      | 6229      | 9924      | 13665     |
| 20            | 1697      | 3662      | 4769      | 6504      | 9823      | 13358     |
| 21            | 1545      | 3233      | 4643      | 6255      | 9549      | 13302     |
| n             | 21        | 21        | 21        | 21        | 21        | 21        |
| average       | 1697      | 3291      | 4887      | 6345      | 9772      | 13348     |
| S.D.          | 71.5      | 109.2     | 160.4     | 178.9     | 206.3     | 221.7     |
| C.V.          | 4.2%      | 3.3%      | 3.3%      | 2.8%      | 2.1%      | 1.7%      |
| average+2S.D. | 1840      | 3510      | 5207      | 6703      | 10184     | 13791     |
| average-2S.D. | 1554      | 3073      | 4566      | 5987      | 9359      | 12905     |

365 CLEIA indicates chemiluminescent enzyme immunoassay; ARC, active renin concentration.

366

367

368 **Table S3.** Accuracy in CLEIA of PAC.

| analyte | plasma              |              | standard            |              |
|---------|---------------------|--------------|---------------------|--------------|
|         | aldosterone (pg/mL) | accuracy (%) | aldosterone (pg/mL) | accuracy (%) |
| 1       | 119.2               | 112.3%       | 139.8               | 97.8%        |
|         | 96.8                | 91.2%        | 139.0               | 97.2%        |
|         | 110.1               | 103.8%       | 139.7               | 97.7%        |
| 2       | 418.5               | 96.2%        | 477.9               | 96.4%        |
|         | 385.4               | 88.6%        | 490.5               | 99.0%        |
|         | 399.5               | 91.8%        | 464.2               | 93.7%        |
| 3       | 1067.4              | 101.8%       | 1371.2              | 100.8%       |
|         | 1051.9              | 100.3%       | 1406.6              | 103.4%       |
|         | 1071.1              | 102.1%       | 1368.3              | 100.6%       |

369 CLEIA indicates chemiluminescent enzyme immunoassay; PAC, plasma aldosterone concentration.

370

371 **Table S4.** Accuracy in CLEIA of ARC.

| analyte<br>sample | plasma         |                 | standard       |                 |
|-------------------|----------------|-----------------|----------------|-----------------|
|                   | ARC<br>(pg/mL) | accuracy<br>(%) | ARC<br>(pg/mL) | accuracy<br>(%) |
| 1                 | 6.6            | 104.8%          | 5.8            | 96.7%           |
|                   | 6.5            | 103.2%          | 5.7            | 95.0%           |
|                   | 6.6            | 104.8%          | 6.0            | 100.0%          |
| 2                 | 58.3           | 98.8%           | 60.1           | 100.2%          |
|                   | 59.1           | 100.2%          | 60.2           | 100.3%          |
|                   | 60.4           | 102.4%          | 59.5           | 99.2%           |
| 3                 | 371.5          | 100.4%          | 410.6          | 102.7%          |
|                   | 370.6          | 100.2%          | 412.4          | 103.1%          |
|                   | 371.6          | 100.4%          | 408.1          | 102.0%          |

372 CLEIA indicates chemiluminescent enzyme immunoassay; ARC, active renin concentration.

373

374

375 **Table S5.** Inter, intra-assay precision in CLEIA of PAC.

376 Inter-assay precision

| sample  | (pg/mL)  |          |          |
|---------|----------|----------|----------|
|         | plasma 1 | plasma 2 | plasma 3 |
| n       | 21       | 21       | 21       |
| average | 181.8    | 457.3    | 1133.5   |
| range   | 44.3     | 44.7     | 64.9     |
| S.D.    | 10.53    | 12.15    | 16.36    |
| C.V.    | 5.8%     | 2.7%     | 1.4%     |

377

378 Intra-assay precision

| time to assay | (pg/mL) |        |        |         |         |         |       |       |       |      |
|---------------|---------|--------|--------|---------|---------|---------|-------|-------|-------|------|
|               | 0 days  | 2 days | 7 days | 10 days | 13 days | 15 days | mean  | Range | SD    | CV   |
| sample 1      | 153.0   | 194.8  | 162.1  | 179.7   | 153.0   | 163.4   | 167.7 | 41.8  | 16.49 | 9.8% |
| sample 2      | 457.0   | 464.1  | 473.6  | 482.0   | 457.0   | 467.8   | 466.9 | 25.0  | 9.77  | 2.1% |

379 CLEIA indicates chemiluminescent enzyme immunoassay; PAC, plasma aldosterone concentration.

380

381

382

383 **Table S6.** Inter-, intra-assay precision in CLEIA of ARC.

384 Inter-assay precision

| (pg/mL) |          |          |          |
|---------|----------|----------|----------|
| sample  | plasma 1 | plasma 2 | plasma 3 |
| n       | 21       | 21       | 21       |
| average | 3.8      | 48.9     | 360.0    |
| range   | 0.3      | 4.8      | 20.4     |
| S.D.    | 0.09     | 1.10     | 5.47     |
| C.V.    | 2.4%     | 2.2%     | 1.5%     |

385

386 Intra-assay precision

| (pg/mL)       |        |        |        |         |         |         |      |       |      |      |
|---------------|--------|--------|--------|---------|---------|---------|------|-------|------|------|
| time to assay | 0 days | 2 days | 7 days | 10 days | 13 days | 15 days | mean | Range | SD   | CV   |
| sample 1      | 3.1    | 2.9    | 3      | 3.2     | 3.1     | 3.1     | 3.1  | 0.3   | 0.10 | 3.2% |
| sample 2      | 44.1   | 43.9   | 43.3   | 44.6    | 44.2    | 45.2    | 44.2 | 1.9   | 0.64 | 1.4% |

387 CLEIA indicates chemiluminescent enzyme immunoassay; ARC, active renin concentration.

388

389

390 **Table S7.** Linearity in CLEIA of PAC.

| parameters             |       | sample 1 | sample 2 |
|------------------------|-------|----------|----------|
| aldosterone<br>(pg/mL) | 0/10  | 0.0      | 0.0      |
|                        | 1/10  | 57.9     | 130.2    |
|                        | 2/10  | 116.3    | 256.2    |
|                        | 3/10  | 172.4    | 372.1    |
|                        | 4/10  | 216.6    | 515.8    |
|                        | 5/10  | 299.9    | 622.6    |
|                        | 6/10  | 345.4    | 732.7    |
|                        | 7/10  | 401.6    | 867.5    |
|                        | 8/10  | 451.1    | 998.0    |
|                        | 9/10  | 481.1    | 1110.7   |
| %observed<br>/expected | 10/10 | 541.0    | 1214.2   |
|                        | 1/10  | 107%     | 107%     |
|                        | 2/10  | 107%     | 106%     |
|                        | 3/10  | 106%     | 102%     |
|                        | 4/10  | 100%     | 106%     |
|                        | 5/10  | 111%     | 103%     |
|                        | 6/10  | 106%     | 101%     |
|                        | 7/10  | 106%     | 102%     |
|                        | 8/10  | 104%     | 103%     |
|                        | 9/10  | 99%      | 102%     |
| 10/10                  | 100%  | 100%     |          |

391 CLEIA indicates chemiluminescent enzyme immunoassay; PAC, plasma aldosterone concentration.

392



393 **Table S8.** Linearity in CLEIA of ARC.

| parameters             |       | sample 1 | sample 2 | sample 3 |
|------------------------|-------|----------|----------|----------|
| ARC<br>(pg/mL)         | 0/10  | 0.0      | 0.0      | 0.0      |
|                        | 1/10  | 3.8      | 15.5     | 46.4     |
|                        | 2/10  | 7.5      | 33.2     | 91.0     |
|                        | 3/10  | 11.6     | 48.4     | 141.3    |
|                        | 4/10  | 15.2     | 66.1     | 191.3    |
|                        | 5/10  | 18.5     | 78.5     | 242.5    |
|                        | 6/10  | 21.9     | 95.4     | 293.6    |
|                        | 7/10  | 25.4     | 108.9    | 331.1    |
|                        | 8/10  | 29.4     | 126.4    | 373.0    |
|                        | 9/10  | 32.9     | 145.2    | 416.0    |
|                        | 10/10 | 35.7     | 157.3    | 469.7    |
| %observed<br>/expected | 1/10  | 106%     | 99%      | 99%      |
|                        | 2/10  | 105%     | 106%     | 97%      |
|                        | 3/10  | 108%     | 103%     | 100%     |
|                        | 4/10  | 106%     | 105%     | 102%     |
|                        | 5/10  | 104%     | 100%     | 103%     |
|                        | 6/10  | 102%     | 101%     | 104%     |
|                        | 7/10  | 102%     | 99%      | 101%     |
|                        | 8/10  | 103%     | 100%     | 99%      |
|                        | 9/10  | 102%     | 103%     | 98%      |
|                        |       | 10/10    | 100%     | 100%     |

394 CLEIA indicates chemiluminescent enzyme immunoassay; ARC, active renin concentration.

395

396

397 **Table S9.** Recovery in CLEIA of PAC.

| sample | zero-spike<br>(pg/mL) | expected<br>-recovery<br>(pg/mL) | spike<br>(pg/mL) | recovery<br>(pg/mL) | %recovery<br>(%) |
|--------|-----------------------|----------------------------------|------------------|---------------------|------------------|
| 1      | 161.1                 | 50.0                             | 214.4            | 53.3                | 106.6 %          |
| 2      | 255.3                 | 200.0                            | 432.8            | 177.5               | 88.8 %           |
| 3      | 750.9                 | 400.0                            | 1138.5           | 387.6               | 96.9 %           |

398 CLEIA indicates chemiluminescent enzyme immunoassay; PAC, plasma aldosterone concentration.

399

400

401

402

403

404

405 **Table S10.** Interference in CLEIA of PAC

| interferent          | concentration tested | PAC (pg/mL) | interference | PAC (pg/mL) | interference |
|----------------------|----------------------|-------------|--------------|-------------|--------------|
| ascorbic acid        | 0 mg/dL              | 120.0       | 100 %        | 698.2       | 100 %        |
|                      | 10 mg/dL             | 132.2       | 110 %        | 709.0       | 102 %        |
|                      | 20 mg/dL             | 131.3       | 109 %        | 721.0       | 103 %        |
|                      | 30 mg/dL             | 131.2       | 109 %        | 706.0       | 101 %        |
|                      | 40 mg/dL             | 131.6       | 110 %        | 739.6       | 106 %        |
|                      | 50 mg/dL             | 137.5       | 115 %        | 709.5       | 102 %        |
| hemoglobin           | 0 mg/dL              | 161.6       | 100 %        | 706.0       | 100 %        |
|                      | 100 mg/dL            | 149.5       | 93 %         | 735.8       | 104 %        |
|                      | 200 mg/dL            | 143.9       | 89 %         | 708.1       | 100 %        |
|                      | 300 mg/dL            | 162.3       | 100 %        | 736.0       | 104 %        |
|                      | 400 mg/dL            | 161.4       | 100 %        | 721.9       | 102 %        |
|                      | 500 mg/dL            | 153.4       | 95 %         | 700.6       | 99 %         |
| bilirubin            | 0 mg/dL              | 141.7       | 100 %        | 712.9       | 100 %        |
|                      | 3.8 mg/dL            | 159.3       | 112 %        | 713.2       | 100 %        |
|                      | 7.6 mg/dL            | 159.3       | 112 %        | 706.8       | 99 %         |
|                      | 11.3 mg/dL           | 133.0       | 94 %         | 711.4       | 100 %        |
|                      | 15.1 mg/dL           | 160.3       | 113 %        | 710.6       | 100 %        |
|                      | 18.9 mg/dL           | 150.5       | 106 %        | 701.7       | 98 %         |
| bilirubin -conjugate | 0 mg/dL              | 133.7       | 100 %        | 687.4       | 100 %        |
|                      | 4.2 mg/dL            | 152.0       | 114 %        | 665.9       | 97 %         |
|                      | 8.3 mg/dL            | 133.0       | 99 %         | 693.8       | 101 %        |
|                      | 12.5 mg/dL           | 140.5       | 105 %        | 698.1       | 102 %        |
|                      | 16.7 mg/dL           | 138.5       | 104 %        | 671.9       | 98 %         |
|                      | 20.8 mg/dL           | 142.4       | 107 %        | 693.4       | 101 %        |
| chyle                | 0 FTU                | 135.4       | 100 %        | 693.6       | 100 %        |
|                      | 282 FTU              | 138.2       | 102 %        | 700.6       | 101 %        |
|                      | 564 FTU              | 132.9       | 98 %         | 680.4       | 98 %         |
|                      | 846 FTU              | 133.9       | 99 %         | 671.9       | 97 %         |
|                      | 1,128 FTU            | 121.9       | 90 %         | 676.0       | 97 %         |
|                      | 1,410 FTU            | 118.8       | 88 %         | 676.8       | 98 %         |
| rheumatoid factor    | 0 IU/mL              | 138.4       | 100 %        | 678.1       | 100 %        |
|                      | 100 IU/mL            | 140.7       | 102 %        | 653.3       | 96 %         |
|                      | 200 IU/mL            | 159.6       | 115 %        | 700.2       | 103 %        |
|                      | 300 IU/mL            | 165.2       | 119 %        | 675.4       | 100 %        |

406 CLEIA indicates chemiluminescent enzyme immunoassay; PAC, plasma aldosterone concentration.

407

408

409

410

411

412

413

414 **Table S11.** Cross-reactivity in CLEIA of PAC

| cross-reactants          | cross-reactivity |
|--------------------------|------------------|
| Corticosterone           | 0.00531 %        |
| 18-hydroxycorticosterone | 0.11028 %        |
| Cortisol                 | < 0.00015 %      |
| Cortisone                | < 0.00015 %      |
| Deoxycorticosterone      | 0.00065 %        |
| Progesterone             | < 0.00015 %      |
| Tetrahydrocorticosterone | < 0.00015 %      |
| Dexamethasone            | < 0.00002 %      |
| Prednisolone             | 0.00002 %        |
| Spirolactone             | < 0.00015 %      |
| Eplerenone               | < 0.00015 %      |

415 CLEIA indicates chemiluminescent enzyme immunoassay; PAC, plasma aldosterone concentration.

416

417 **Table S12.** Recovery in CLEIA of ARC

| sample | zero-spike<br>(pg/mL) | expected<br>-spike<br>(pg/mL) | spike<br>(pg/mL) | recovery<br>(pg/mL) | %recovery<br>(%) |
|--------|-----------------------|-------------------------------|------------------|---------------------|------------------|
| 1      | 5.4                   | 2.0                           | 7.4              | 2.0                 | 100.0 %          |
| 2      | 40.2                  | 20.0                          | 59.2             | 19.0                | 95.0 %           |
| 3      | 285.9                 | 100.0                         | 386.1            | 100.2               | 100.2 %          |

418 CLEIA indicates chemiluminescent enzyme immunoassay; ARC, active renin concentration.

419

420

421 **Table S13.** Interference in CLEIA of ARC

| interferent          | concentration | ARC (pg/mL) | interference | ARC (pg/mL) | interference |
|----------------------|---------------|-------------|--------------|-------------|--------------|
| Ascorbic acid        | 0 mg/dL       | 35.8        | 100 %        | 252.6       | 100 %        |
|                      | 10 mg/dL      | 36.1        | 101 %        | 256.4       | 102 %        |
|                      | 20 mg/dL      | 36.4        | 102 %        | 252.8       | 100 %        |
|                      | 30 mg/dL      | 36.2        | 101 %        | 258.8       | 102 %        |
|                      | 40 mg/dL      | 36.3        | 101 %        | 262.6       | 104 %        |
|                      | 50 mg/dL      | 37.2        | 104 %        | 267.6       | 106 %        |
| Hemoglobin           | 0 mg/dL       | 36.6        | 100 %        | 268.4       | 100 %        |
|                      | 100 mg/dL     | 36.7        | 100 %        | 264.3       | 98 %         |
|                      | 200 mg/dL     | 36.7        | 100 %        | 269.2       | 100 %        |
|                      | 300 mg/dL     | 36.0        | 98 %         | 264.5       | 99 %         |
|                      | 400 mg/dL     | 36.2        | 99 %         | 270.8       | 101 %        |
|                      | 500 mg/dL     | 36.5        | 100 %        | 271.4       | 101 %        |
| Bilirubin            | 0 mg/dL       | 36.4        | 100 %        | 272.5       | 100 %        |
|                      | 3.8 mg/dL     | 37.0        | 102 %        | 272.8       | 100 %        |
|                      | 7.6 mg/dL     | 36.4        | 100 %        | 269.5       | 99 %         |
|                      | 11.3 mg/dL    | 37.1        | 102 %        | 272.4       | 100 %        |
|                      | 15.1 mg/dL    | 36.4        | 100 %        | 272.0       | 100 %        |
|                      | 18.9 mg/dL    | 36.0        | 99 %         | 265.3       | 97 %         |
| Bilirubin -conjugate | 0 mg/dL       | 37.7        | 100 %        | 272.6       | 100 %        |
|                      | 4.2 mg/dL     | 36.7        | 97 %         | 268.5       | 98 %         |
|                      | 8.3 mg/dL     | 37.4        | 99 %         | 271.6       | 100 %        |
|                      | 12.5 mg/dL    | 38.5        | 102 %        | 264.5       | 97 %         |
|                      | 16.7 mg/dL    | 36.8        | 98 %         | 261.0       | 96 %         |
|                      | 20.8 mg/dL    | 37.5        | 99 %         | 259.4       | 95 %         |
| Chyle                | 0 FTU         | 37.4        | 100 %        | 273.5       | 100 %        |
|                      | 282 FTU       | 37.1        | 99 %         | 258.3       | 94 %         |
|                      | 564 FTU       | 36.5        | 98 %         | 272.1       | 99 %         |
|                      | 846 FTU       | 36.3        | 97 %         | 273.4       | 100 %        |
|                      | 1,128 FTU     | 36.8        | 98 %         | 268.9       | 98 %         |
|                      | 1,410 FTU     | 34.1        | 91 %         | 270.4       | 99 %         |
| Rheumatoid factor    | 0 IU/mL       | 39.9        | 100.0 %      | 283.5       | 100.0 %      |
|                      | 110 IU/mL     | 41.2        | 103.3 %      | 281.3       | 99.2 %       |
|                      | 220 IU/mL     | 38.7        | 97.0 %       | 279.1       | 98.4 %       |
|                      | 330 IU/mL     | 38.7        | 97.0 %       | 286.2       | 101.0 %      |

422 CLEIA indicates chemiluminescent enzyme immunoassay; ARC, active renin concentration.

423 **Table S14.** Cryoactivation of active renin concentration at 0°C

| storage time<br>(hour) | relative value (v.s. 0 hour) |          |          |          |          |
|------------------------|------------------------------|----------|----------|----------|----------|
|                        | plasma 1                     | plasma 2 | plasma 3 | plasma 4 | plasma 5 |
| 0                      | 100%                         | 100%     | 100%     | 100%     | 100%     |
| 1                      | 105%                         | 106%     | 114%     | 110%     | 111%     |
| 3                      | 110%                         | 123%     | 119%     | 113%     | 134%     |
| 6                      | 116%                         | 118%     | 125%     | 114%     | 136%     |
| 9                      | 112%                         | 125%     | 129%     | 116%     | 136%     |
| 12                     | 121%                         | 134%     | 135%     | 122%     | 148%     |
| 24                     | 132%                         | 158%     | 149%     | 130%     | 152%     |

424

425

426 **Table S15.** Cryoactivation of active renin concentration at 5°C

| storage time<br>(hour) | relative value (v.s. 0 hour) |          |          |          |           |
|------------------------|------------------------------|----------|----------|----------|-----------|
|                        | plasma 6                     | plasma 7 | plasma 8 | plasma 9 | plasma 10 |
| 0                      | 100%                         | 100%     | 100%     | 100%     | 100%      |
| 1                      | 101%                         | 100%     | 106%     | 100%     | 104%      |
| 3                      | 102%                         | 93%      | 109%     | 100%     | 102%      |
| 6                      | 103%                         | 100%     | 106%     | 98%      | 98%       |
| 9                      | 101%                         | 104%     | 97%      | 104%     | 101%      |
| 12                     | 107%                         | 111%     | 113%     | 109%     | 105%      |
| 24                     | 92%                          | 118%     | 110%     | 110%     | 105%      |

427

428

429 **Table S16.** Cryoactivation of active renin concentration at 26°C

| storage time<br>(hour) | relative value (v.s. 0 hour) |           |           |           |           |
|------------------------|------------------------------|-----------|-----------|-----------|-----------|
|                        | plasma 11                    | plasma 12 | plasma 13 | plasma 14 | plasma 15 |
| 0                      | 100%                         | 100%      | 100%      | 100%      | 100%      |
| 1                      | 104%                         | 104%      | 95%       | 95%       | 95%       |
| 3                      | 100%                         | 106%      | 102%      | 98%       | 98%       |
| 6                      | 104%                         | 102%      | 102%      | 91%       | 91%       |
| 9                      | 87%                          | 98%       | 86%       | 87%       | 87%       |
| 12                     | 91%                          | 98%       | 88%       | 86%       | 85%       |
| 24                     | 91%                          | 102%      | 88%       | 83%       | 82%       |

430

431

432

433 **Table S17.** Influence of freeze-thaw cycles on active renin concentration

| number of freeze-thaw cycles | relative value (v.s. 0 cycle) |           |           |
|------------------------------|-------------------------------|-----------|-----------|
|                              | plasma 16                     | plasma 17 | plasma 18 |
| 0                            | 100%                          | 100%      | 100%      |
| 1                            | 103%                          | 109%      | 92%       |
| 3                            | 101%                          | 91%       | 100%      |
| 5                            | 98%                           | 90%       | 95%       |

434

435 **Table S18.** Baseline measurements of PAC and ARC by the CLEIA  
436

| parameters                           | unilateral PA                   | bilateral PA                    | essential hypertension          | <i>P</i> values |
|--------------------------------------|---------------------------------|---------------------------------|---------------------------------|-----------------|
| Number                               | 75                              | 50                              | 97                              |                 |
| PAC (ng/dL)                          | 39.6 ± 21.9<br>36.3 (20.6-52.9) | 19.5 ± 9.1<br>18.0 (13.5-21.4)  | 17.4 ± 9.8<br>15.5 (11.0-22.9)  | < 0.05 * † ‡    |
| ARC (pg/mL)                          | 1.38 ± 1.07<br>1.05 (0.70-1.60) | 2.17 ± 1.83<br>1.50 (1.00-2.65) | 6.45 ± 5.24<br>5.10 (2.85-8.15) | < 0.05 † ‡      |
| ARR <sub>ARC</sub> (ng/dL per pg/mL) | 45.0 ± 41.7<br>31.1 (17.7-64.0) | 14.3 ± 8.4<br>12.5 (8.09-19.5)  | 4.1 ± 3.4<br>2.69 (1.55-9.85)   | < 0.05 * † ‡    |

437 Data were shown as mean ± standard deviation in an upper row and median (25-75<sup>th</sup> percentile) in a  
438 lower row. PAC indicates plasma aldosterone concentration; ARC, active renin concentration; CLEIA,  
439 chemiluminescent enzyme immunoassay; PA, primary aldosteronism; ARR<sub>ARC</sub>, aldosterone-over-renin  
440 concentration ratio

441 \* denotes statistical significance in comparison between unilateral and bilateral PA groups.

442 † denotes statistical significance in comparison between unilateral PA and essential hypertension  
443 groups.

444 ‡ denotes statistical significance in comparison between bilateral PA and essential hypertension groups.

445

446

447 **Table S19.** Comparison of PAC measurements based on renal function

| parameters                        | total            | CKD              | non-CKD          | <i>P</i> values |
|-----------------------------------|------------------|------------------|------------------|-----------------|
| Number                            | 120              | 13               | 107              |                 |
| Serum creatinine (mg/dL)          | 0.70 (0.59-0.86) | 1.07 (0.86-1.32) | 0.66 (0.58-0.85) | < 0.001 *       |
| eGFR (mL/min/1.73m <sup>2</sup> ) | 76.8 (69.0-88.6) | 48.2 (43.1-58.7) | 79.2 (72.0-90.0) | < 0.001 *       |
| LC-MS/MS PAC (ng/dL)              | 45.6 (21.0-78.7) | 34.8 (18.7-86.5) | 46.7 (24.0-78.8) | NS              |
| CLEIA PAC (ng/dL)                 | 57.6 (31.7-91.9) | 50.1 (30.9-96.2) | 59.4 (31.6-92.1) | NS              |

448 Data were shown as and 25-75<sup>th</sup> percentile. PAC indicates plasma aldosterone concentration; CKD,  
449 chronic kidney disease; GFR, estimated glomerular filtration rate; LC-MS/MS, liquid chromatography  
450 tandem mass spectrometry; CLEIA; chemiluminescent enzyme immunoassay; NS, no significant  
451 difference. \* denotes statistical significance in comparison between CKD and non-CKD.

452

453

454

455

456  
457

**Table S20A.** Criterion values and coordinates of ROC analysis with ARR<sub>ARC</sub> for PA

| crit               | sensitivity  | 95% CI             | specificity  | 95% CI             | +LR         | -LR         | +PV         | -PV         | cost        |
|--------------------|--------------|--------------------|--------------|--------------------|-------------|-------------|-------------|-------------|-------------|
| ≥0.196             | 100.00       | 97.1 - 100.0       | 0.00         | 0.0 - 3.7          | 1.00        |             | 56.3        |             | 0.44        |
| >3.073             | 100.00       | 97.1 - 100.0       | 56.70        | 46.3 - 66.7        | 2.31        | 0.00        | 74.9        | 100.0       | 0.19        |
| >4.495             | 96.00        | 90.9 - 98.7        | 70.10        | 60.0 - 79.0        | 3.21        | 0.057       | 80.5        | 93.2        | 0.15        |
| >5.794             | 92.00        | 85.8 - 96.1        | 75.26        | 65.5 - 83.5        | 3.72        | 0.11        | 82.7        | 88.0        | 0.15        |
| → <b>&gt;6.024</b> | <b>92.00</b> | <b>85.8 - 96.1</b> | <b>76.29</b> | <b>66.6 - 84.3</b> | <b>3.88</b> | <b>0.10</b> | <b>83.3</b> | <b>88.1</b> | <b>0.15</b> |
| >7.705             | 88.80        | 81.9 - 93.7        | 82.47        | 73.4 - 89.4        | 5.07        | 0.14        | 86.7        | 85.1        | 0.14        |
| >7.730             | 88.00        | 81.0 - 93.1        | 84.54        | 75.8 - 91.1        | 5.69        | 0.14        | 88.0        | 84.5        | 0.14        |
| >9.030             | 84.00        | 76.4 - 89.9        | 89.69        | 81.9 - 94.9        | 8.15        | 0.18        | 91.3        | 81.3        | 0.14        |
| >10.80             | 81.00        | 72.8 - 87.3        | 93.81        | 87.0 - 97.7        | 13.06       | 0.20        | 94.4        | 79.1        | 0.14        |
| >11.13             | 81.00        | 72.8 - 87.3        | 94.85        | 88.4 - 98.3        | 15.68       | 0.20        | 95.3        | 79.3        | 0.13        |
| >11.22             | 80.80        | 71.9 - 86.6        | 94.85        | 88.4 - 98.3        | 15.52       | 0.21        | 95.2        | 78.6        | 0.14        |
| >11.74             | 76.00        | 67.5 - 83.2        | 94.85        | 88.4 - 98.3        | 14.74       | 0.25        | 95.0        | 75.4        | 0.16        |
| >12.54             | 72.00        | 63.3 - 79.7        | 95.88        | 89.8 - 98.9        | 17.46       | 0.29        | 95.7        | 72.7        | 0.18        |
| >13.71             | 68.80        | 59.9 - 76.8        | 97.94        | 92.7 - 99.7        | 33.37       | 0.32        | 97.7        | 70.9        | 0.19        |
| >14.12             | 68.00        | 59.1 - 76.1        | 97.94        | 92.7 - 99.7        | 32.98       | 0.33        | 97.7        | 70.4        | 0.19        |
| >15.60             | 64.00        | 54.9 - 72.4        | 97.94        | 92.7 - 99.7        | 31.04       | 0.37        | 97.6        | 67.9        | 0.21        |
| >17.07             | 60.00        | 50.9 - 68.7        | 97.94        | 92.7 - 99.7        | 29.10       | 0.41        | 97.4        | 65.5        | 0.23        |
| >18.08             | 56.00        | 46.8 - 64.9        | 98.97        | 94.4 - 100.0       | 54.32       | 0.44        | 98.6        | 63.6        | 0.25        |
| >228.3             | 0.00         | 0.0 - 2.9          | 100.00       | 96.3 - 100.0       |             | 1.00        |             | 43.7        | 0.56        |

458 The arrow and bold indicate the cut-off value in screening PA from EH. ARR<sub>ARC</sub>, aldosterone-over-  
459 renin concentration ratio; PA, primary aldosteronism; EH, essential hypertension; +PV, positive  
460 predictive value; -PV, negative predictive value; +LR, positive likelihood ratio; -LR, negative likelihood  
461 ratio.

462

**Table S20B.** Criterion values and coordinates of ROC analysis with ARR<sub>ARC</sub> for APA

463  
464

| crit               | sensitivity  | 95% CI             | specificity  | 95% CI             | +LR         | -LR          | +PV         | -PV         | cost         |
|--------------------|--------------|--------------------|--------------|--------------------|-------------|--------------|-------------|-------------|--------------|
| ≥0.196             | 100.00       | 95.2 - 100.0       | 0.00         | 0.0 - 3.7          | 1.00        |              | 43.6        |             | 0.564        |
| >3.073             | 100.00       | 95.2 - 100.0       | 56.70        | 46.3 - 66.7        | 2.31        | 0.00         | 64.1        | 100.0       | 0.244        |
| >7.614             | 96.00        | 88.8 - 99.2        | 82.47        | 73.4 - 89.4        | 5.48        | 0.049        | 80.9        | 96.4        | 0.116        |
| → <b>&gt;7.707</b> | <b>96.00</b> | <b>88.8 - 99.2</b> | <b>83.51</b> | <b>74.6 - 90.3</b> | <b>5.82</b> | <b>0.048</b> | <b>81.8</b> | <b>96.4</b> | <b>0.110</b> |
| >10.79             | 93.33        | 85.1 - 97.8        | 93.81        | 87.0 - 97.7        | 15.09       | 0.071        | 92.1        | 94.8        | 0.0640       |
| >11.13             | 93.33        | 85.1 - 97.8        | 94.85        | 88.4 - 98.3        | 18.11       | 0.070        | 93.3        | 94.8        | 0.0581       |
| >11.40             | 92.00        | 83.4 - 97.0        | 94.85        | 88.4 - 98.3        | 17.85       | 0.084        | 93.2        | 93.9        | 0.0640       |
| >12.35             | 88.00        | 78.4 - 94.4        | 95.88        | 89.8 - 98.9        | 21.34       | 0.13         | 94.3        | 91.2        | 0.0756       |
| >14.80             | 84.00        | 73.7 - 91.4        | 97.94        | 92.7 - 99.7        | 40.74       | 0.16         | 96.9        | 88.8        | 0.0814       |
| >16.12             | 80.00        | 69.2 - 88.4        | 97.94        | 92.7 - 99.7        | 38.80       | 0.20         | 96.8        | 86.4        | 0.0988       |
| >17.16             | 76.00        | 64.7 - 85.1        | 97.94        | 92.7 - 99.7        | 36.86       | 0.25         | 96.6        | 84.1        | 0.116        |
| >18.63             | 70.67        | 59.0 - 80.6        | 98.97        | 94.4 - 100.0       | 68.55       | 0.30         | 98.1        | 81.4        | 0.134        |
| >19.30             | 70.67        | 59.0 - 80.6        | 100.00       | 96.3 - 100.0       |             | 0.29         | 100.0       | 81.5        | 0.128        |
| >228.2             | 0.00         | 0.0 - 4.8          | 100.00       | 96.3 - 100.0       |             | 1.00         |             | 56.4        | 0.436        |

465 The arrow and bold indicate the cut-off value in screening APA from EH. ARR<sub>ARC</sub>, aldosterone-over-  
466 renin concentration ratio; APA, aldosterone-producing adenoma; EH, essential hypertension; +PV,  
467 positive predictive value; -PV, negative predictive value; +LR, positive likelihood ratio; -LR, negative  
468 likelihood ratio.

469

470

471 **Table S21A.** Sensitivity and specificity of screening for PA based on CLEIA measurements

| sensitivity (%) |      | plasma aldosterone concentration (ng/dL) |      |      |      |      |      |      |      |      |      |      |      |      |      |
|-----------------|------|------------------------------------------|------|------|------|------|------|------|------|------|------|------|------|------|------|
| ARC (pg/mL)     | 5.0  | 6.0                                      | 7.0  | 8.0  | 9.0  | 10.0 | 11.0 | 12.0 | 13.0 | 14.0 | 15.0 | 16.0 | 17.0 | 18.0 | 19.0 |
| 1.0             | 80.8 | 80.0                                     | 80.0 | 80.0 | 77.6 | 76.8 | 76.0 | 76.0 | 73.6 | 68.8 | 64.8 | 61.6 | 57.6 | 56.0 | 48.8 |
| 2.0             | 80.8 | 80.0                                     | 80.0 | 80.0 | 77.6 | 76.8 | 76.0 | 76.0 | 73.6 | 68.8 | 64.8 | 61.6 | 57.6 | 56.0 | 48.8 |
| 3.0             | 91.2 | 90.4                                     | 90.4 | 90.4 | 86.4 | 85.6 | 84.8 | 84.8 | 81.6 | 76.8 | 72.8 | 68.8 | 64.0 | 61.6 | 55.2 |
| 4.0             | 96.8 | 96.0                                     | 96.0 | 96.0 | 92.0 | 91.2 | 90.4 | 90.4 | 87.2 | 82.4 | 78.4 | 74.4 | 69.6 | 67.2 | 59.2 |
| 5.0             | 97.6 | 96.8                                     | 96.8 | 96.8 | 92.8 | 92.0 | 91.2 | 91.2 | 88.0 | 83.2 | 79.2 | 75.2 | 70.4 | 68.0 | 60.0 |
| 6.0             | 99.2 | 98.4                                     | 98.4 | 98.4 | 94.4 | 93.6 | 92.8 | 92.8 | 89.6 | 84.8 | 80.8 | 76.8 | 71.2 | 68.8 | 60.8 |
| 7.0             | 99.2 | 98.4                                     | 98.4 | 98.4 | 94.4 | 93.6 | 92.8 | 92.8 | 89.6 | 84.8 | 80.8 | 76.8 | 71.2 | 68.8 | 60.8 |
| 8.0             | 99.2 | 98.4                                     | 98.4 | 98.4 | 94.4 | 93.6 | 92.8 | 92.8 | 89.6 | 84.8 | 80.8 | 76.8 | 71.2 | 68.8 | 60.8 |

| specificity (%) |      | plasma aldosterone concentration (ng/dL) |      |      |      |      |      |      |      |      |      |      |      |      |      |
|-----------------|------|------------------------------------------|------|------|------|------|------|------|------|------|------|------|------|------|------|
| ARC (pg/mL)     | 5.0  | 6.0                                      | 7.0  | 8.0  | 9.0  | 10.0 | 11.0 | 12.0 | 13.0 | 14.0 | 15.0 | 16.0 | 17.0 | 18.0 | 19.0 |
| 1.0             | 97.9 | 97.9                                     | 97.9 | 97.9 | 97.9 | 97.9 | 97.9 | 97.9 | 99.0 | 99.0 | 99.0 | 99.0 | 99.0 | 100  | 100  |
| 2.0             | 90.0 | 90.0                                     | 90.7 | 90.7 | 90.7 | 90.7 | 91.8 | 91.8 | 93.8 | 93.8 | 93.8 | 95.9 | 95.9 | 96.9 | 96.9 |
| 3.0             | 76.3 | 76.3                                     | 77.3 | 77.3 | 77.3 | 77.3 | 78.4 | 78.4 | 81.4 | 81.4 | 81.4 | 86.6 | 88.7 | 91.8 | 92.8 |
| 4.0             | 65.0 | 66.0                                     | 67.0 | 67.0 | 67.0 | 68.0 | 69.1 | 70.1 | 73.2 | 75.3 | 75.3 | 80.4 | 82.5 | 85.6 | 87.6 |
| 5.0             | 57.7 | 58.8                                     | 60.8 | 61.9 | 61.9 | 62.9 | 63.9 | 67.0 | 71.1 | 73.2 | 73.2 | 78.4 | 80.4 | 84.5 | 86.6 |
| 6.0             | 49.5 | 50.5                                     | 52.6 | 54.6 | 54.6 | 56.7 | 57.7 | 60.8 | 64.9 | 69.1 | 71.1 | 76.3 | 78.4 | 83.5 | 85.6 |
| 7.0             | 38.1 | 39.2                                     | 43.3 | 46.4 | 47.4 | 51.5 | 53.6 | 57.7 | 62.9 | 67.0 | 70.1 | 75.3 | 77.3 | 82.5 | 84.5 |
| 8.0             | 32.0 | 33.0                                     | 37.1 | 40.2 | 47.4 | 45.4 | 47.4 | 52.6 | 58.8 | 62.9 | 70.1 | 71.1 | 74.2 | 79.4 | 81.4 |

472 PA indicates primary aldosteronism; CLEIA, chemiluminescent enzyme immunoassay; ARC, active  
 473 renin concentration.



474 **Table S21B.** Sensitivity and specificity of screening for APA based on CLEIA measurements

| sensitivity (%) |      | plasma aldosterone concentration (ng/dL) |      |      |      |      |      |      |      |      |      |      |      |      |      |      |
|-----------------|------|------------------------------------------|------|------|------|------|------|------|------|------|------|------|------|------|------|------|
| ARC (pg/mL)     |      | 5.0                                      | 6.0  | 7.0  | 8.0  | 9.0  | 10.0 | 11.0 | 12.0 | 13.0 | 14.0 | 15.0 | 16.0 | 17.0 | 18.0 | 19.0 |
| 1.0             | 42.7 | 42.7                                     | 42.7 | 42.7 | 42.7 | 42.7 | 42.7 | 42.7 | 42.7 | 41.4 | 41.4 | 38.7 | 36.0 | 34.7 | 33.4 | 30.7 |
| 2.0             | 82.7 | 82.7                                     | 82.7 | 82.7 | 82.7 | 82.7 | 82.7 | 81.4 | 81.4 | 78.7 | 78.7 | 74.7 | 72.0 | 69.4 | 66.7 | 61.4 |
| 3.0             | 93.4 | 93.4                                     | 93.4 | 93.4 | 92.0 | 92.0 | 90.7 | 90.7 | 90.7 | 90.7 | 90.7 | 84.0 | 81.4 | 78.7 | 76.0 | 70.7 |
| 4.0             | 100  | 100                                      | 100  | 100  | 98.7 | 98.7 | 97.4 | 97.4 | 94.7 | 94.7 | 90.7 | 88.0 | 85.4 | 81.4 | 76.0 |      |
| 5.0             | 100  | 100                                      | 100  | 100  | 98.7 | 98.7 | 97.4 | 97.4 | 94.7 | 94.7 | 90.7 | 88.0 | 85.4 | 81.4 | 76.0 |      |
| 6.0             | 100  | 100                                      | 100  | 100  | 98.7 | 98.7 | 97.4 | 97.4 | 94.7 | 94.7 | 90.7 | 88.0 | 85.4 | 81.4 | 76.0 |      |
| 7.0             | 100  | 100                                      | 100  | 100  | 98.7 | 98.7 | 97.4 | 97.4 | 94.7 | 94.7 | 90.7 | 88.0 | 85.4 | 81.4 | 76.0 |      |
| 8.0             | 100  | 100                                      | 100  | 100  | 98.7 | 98.7 | 97.4 | 97.4 | 94.7 | 94.7 | 90.7 | 88.0 | 85.4 | 81.4 | 76.0 |      |

| specificity (%) |      | plasma aldosterone concentration (ng/dL) |      |      |      |      |      |      |      |      |      |      |      |      |      |      |
|-----------------|------|------------------------------------------|------|------|------|------|------|------|------|------|------|------|------|------|------|------|
| ARC (pg/mL)     |      | 5.0                                      | 6.0  | 7.0  | 8.0  | 9.0  | 10.0 | 11.0 | 12.0 | 13.0 | 14.0 | 15.0 | 16.0 | 17.0 | 18.0 | 19.0 |
| 1.0             | 98.0 | 98.0                                     | 98.0 | 98.0 | 98.0 | 98.0 | 98.0 | 98.0 | 98.0 | 99.0 | 99.0 | 99.0 | 99.0 | 99.0 | 100  | 100  |
| 2.0             | 89.7 | 89.7                                     | 90.8 | 90.8 | 90.8 | 90.8 | 90.8 | 91.8 | 93.9 | 93.9 | 93.9 | 93.9 | 95.9 | 95.9 | 97.0 | 97.0 |
| 3.0             | 76.3 | 76.3                                     | 77.4 | 77.4 | 77.4 | 77.4 | 78.4 | 78.4 | 81.5 | 81.5 | 81.5 | 86.6 | 88.7 | 91.8 | 92.8 |      |
| 4.0             | 65.0 | 66.0                                     | 67.1 | 67.1 | 67.1 | 68.1 | 69.1 | 70.2 | 73.2 | 75.3 | 75.3 | 80.5 | 82.5 | 85.6 | 87.7 |      |
| 5.0             | 57.8 | 58.8                                     | 60.9 | 61.9 | 61.9 | 62.9 | 64.0 | 67.1 | 71.2 | 73.2 | 73.2 | 78.4 | 80.5 | 84.6 | 86.6 |      |
| 6.0             | 49.5 | 50.6                                     | 52.6 | 54.7 | 54.7 | 56.8 | 57.8 | 60.9 | 65.0 | 69.1 | 71.2 | 76.3 | 78.4 | 83.6 | 85.6 |      |
| 7.0             | 38.2 | 39.2                                     | 43.3 | 46.4 | 47.5 | 51.6 | 53.7 | 57.8 | 62.9 | 67.1 | 70.2 | 75.3 | 77.4 | 82.5 | 84.6 |      |
| 8.0             | 32.0 | 33.0                                     | 37.2 | 40.3 | 47.5 | 47.5 | 47.5 | 52.6 | 58.8 | 62.9 | 70.2 | 71.2 | 74.3 | 79.4 | 81.5 |      |

475 APA indicates aldosterone-producing adenoma; CLEIA, chemiluminescent enzyme immunoassay;

476 ARC, active renin concentration.

477

478

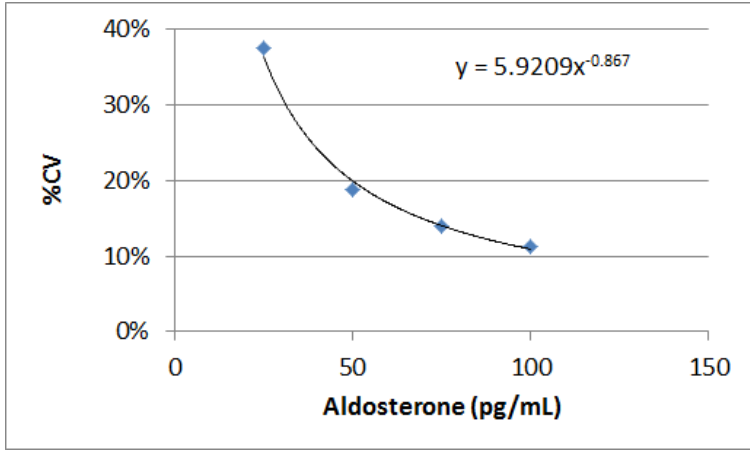

479

480 **Figure S1.** Limit of quantification in CLEIA of PAC. CLEIA indicates chemiluminescent enzyme  
481 immunoassay; PAC, plasma aldosterone concentration.

482

483

484

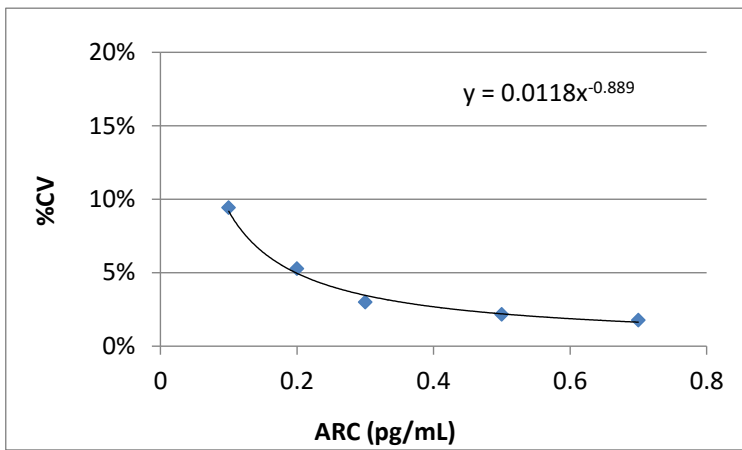

485

486 **Figure S2.** Limit of quantification in CLEIA of ARC. CLEIA indicates chemiluminescent enzyme  
487 immunoassay; ARC, active renin concentration.

488

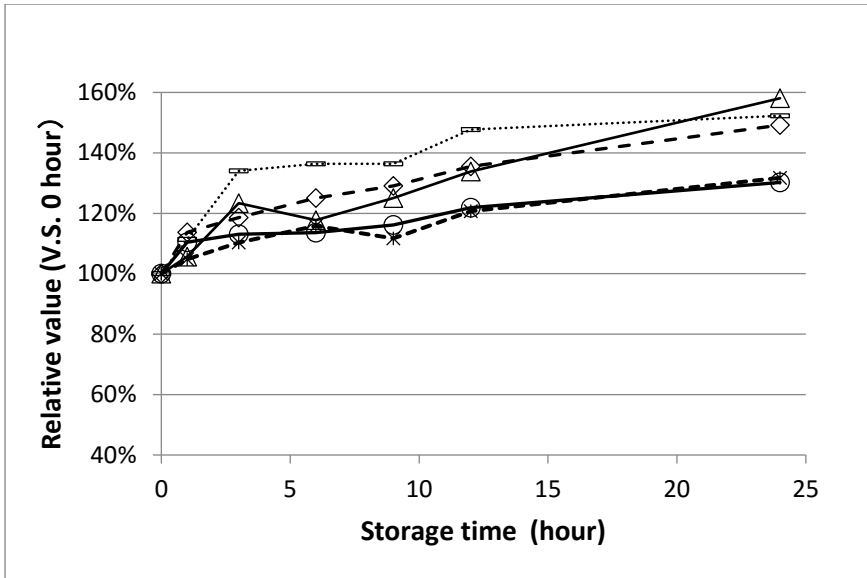

489

490 **Figure S3.** Influence of storage temperature on stability of ARC at 0°C. ARC indicates active renin  
 491 concentration.

492

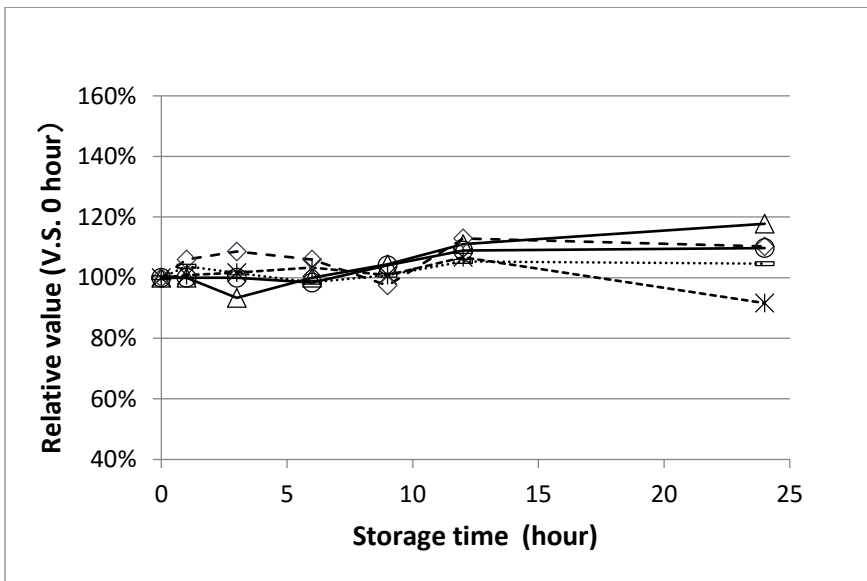

493

494 **Figure S4.** Influence of storage temperature on stability of ARC at 5°C. ARC indicates active renin  
 495 concentration.

496

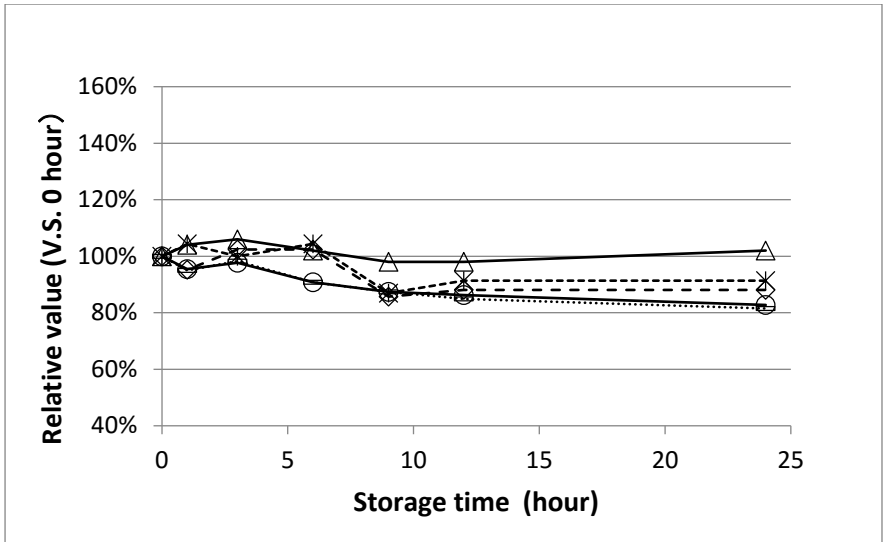

497

498 **Figure S5.** Influence of storage temperature on stability of ARC at 26°C. ARC indicates active renin  
 499 concentration.

500

501

502

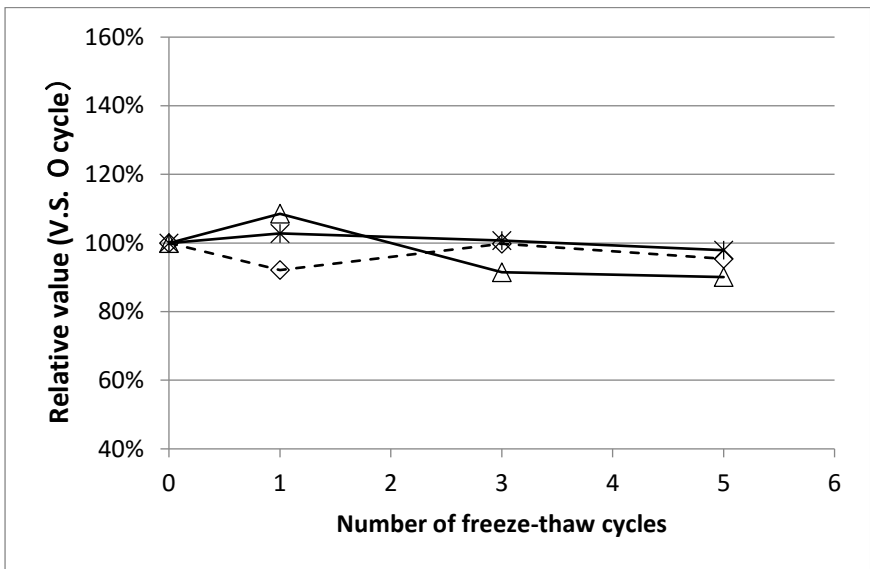

503

504 **Figure S6.** Influence of freeze-thaw cycles on stability of ARC. ARC indicates active renin  
 505 concentration.

506

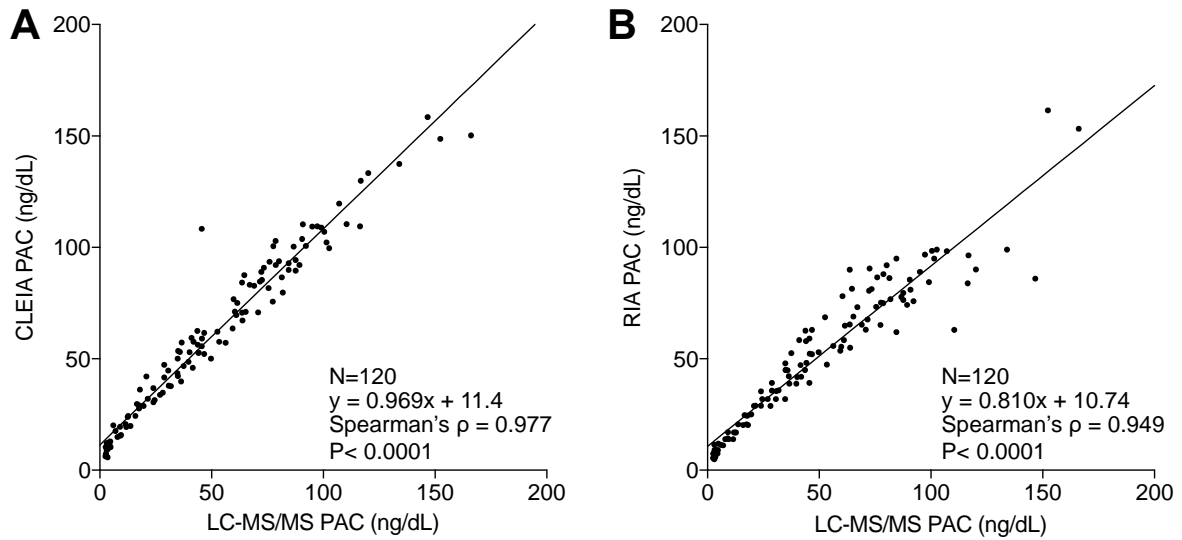

507

508

509

510

511

**Figure S7.** Correlation of PAC between CLEIA and LC-MS/MS (A). Correlation of PAC between RIA and LC-MS/MS (B). PAC indicates plasma aldosterone concentration; CLEIA, chemiluminescent enzyme immunoassay; LC-MS/MS, liquid chromatography tandem mass spectrometry; RIA, radioimmunoassay.

512

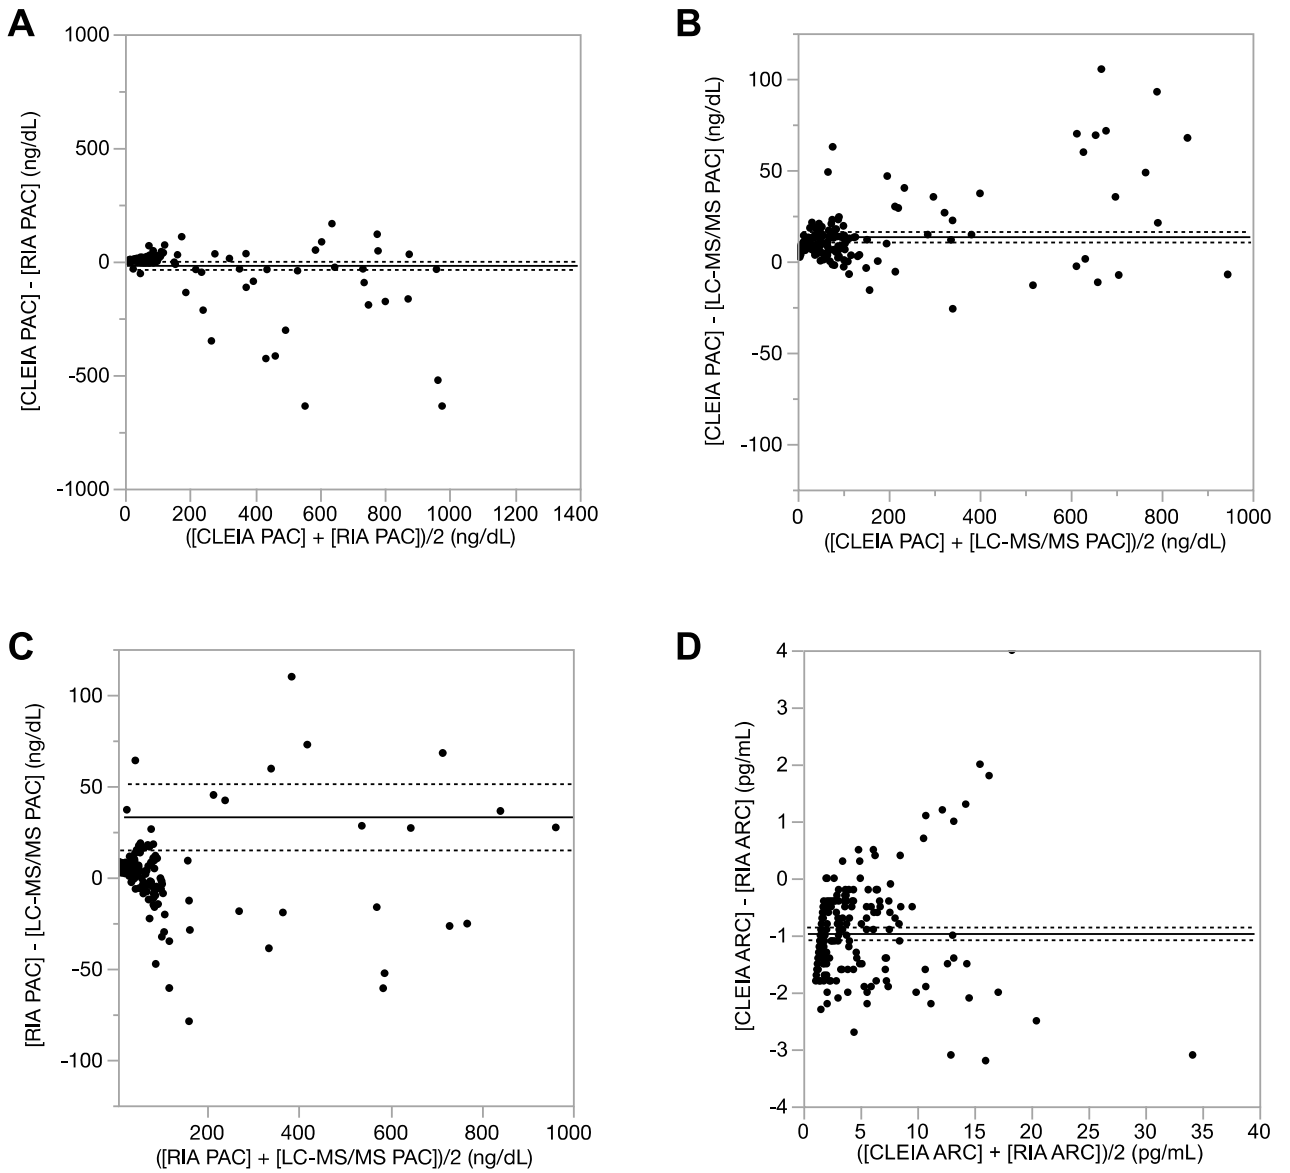

514

515 **Figure S8.** Bland-Altman plot of CLEIA and RIA measurements of aldosterone (A), that of CLEIA and  
 516 LC-MS/MS measurements of aldosterone (B), that of RIA and LC-MS/MS measurements of aldosterone  
 517 (C) and that of CLEIA and RIA measurements of renin (D). RIA indicates radioimmunoassay; PAC,  
 518 plasma aldosterone concentration; CLEIA, chemiluminescent enzyme immunoassay; LC-MS/MS, liquid  
 519 chromatography tandem mass spectrometry; ARC, active renin concentration.

520

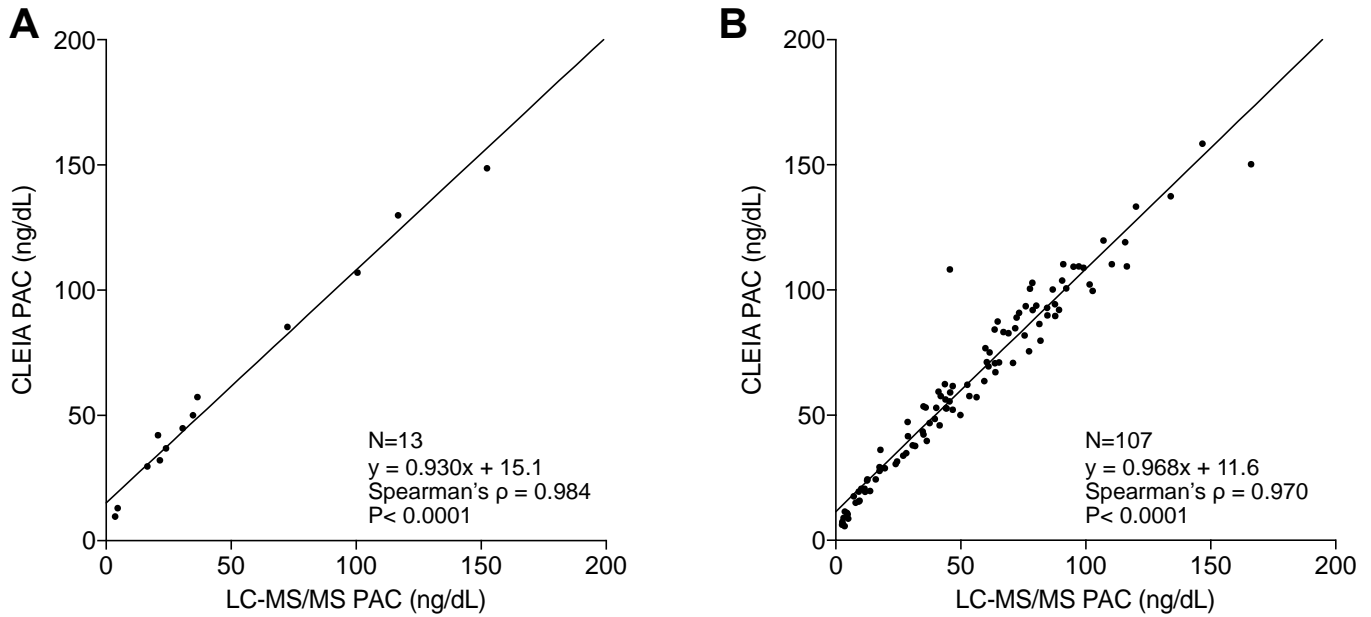

521  
 522 **Figure S9.** Correlation of PAC measurements between CLEIA and LC-MS/MS in those with renal  
 523 insufficiency (A) and without renal insufficiency (B). PAC indicates plasma aldosterone concentration;  
 524 CLEIA, chemiluminescent enzyme immunoassay; LC-MS/MS, liquid chromatography tandem mass  
 525 spectrometry.

526

527

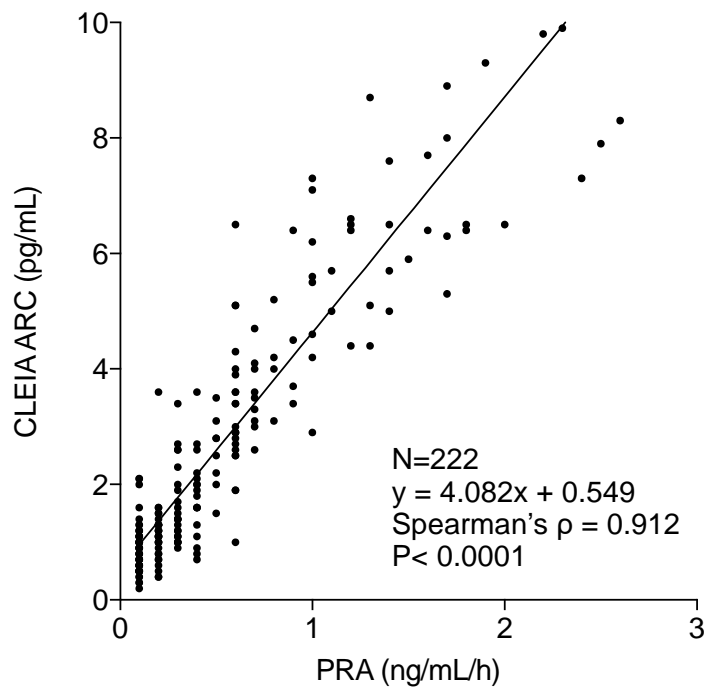

528  
 529 **Figure S10.** Correlation of measurements between CLEIA ARC and PRA. CLEIA indicates  
 530 chemiluminescent enzyme immunoassay; ARC, active renin concentration; PRA, plasma renin  
 531 activity.

532

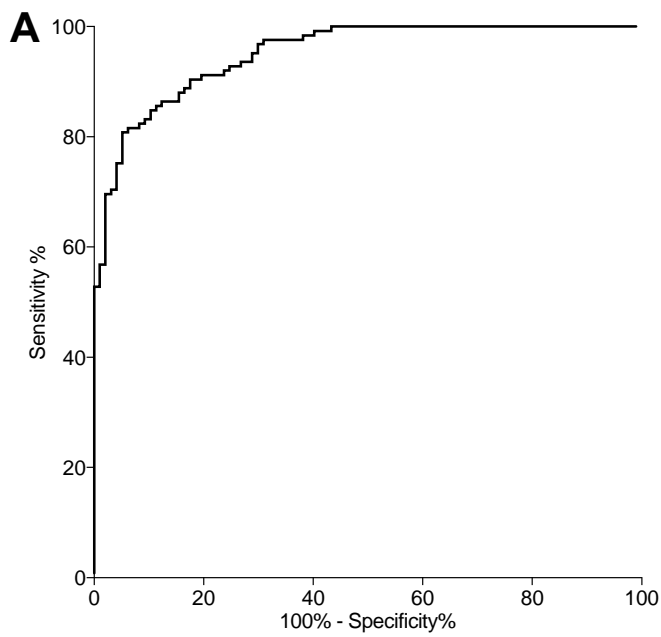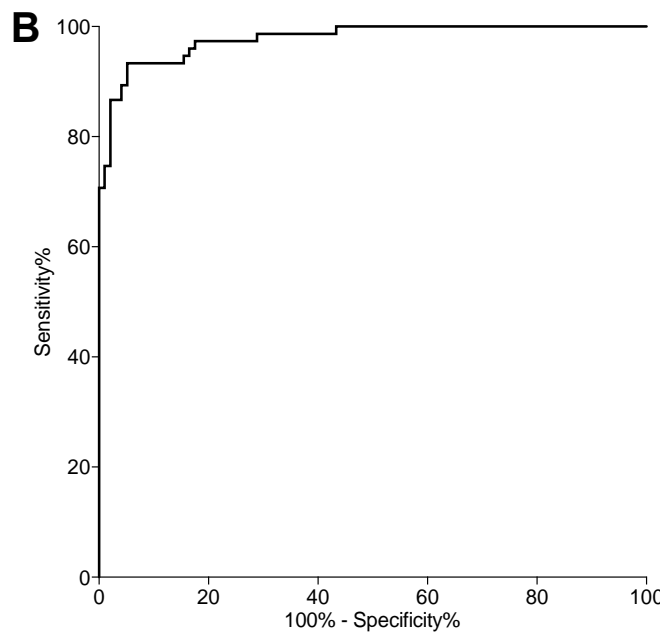

533

534 **Figure S11.** Receiver operating characteristic analysis of  $ARR_{ARC}$  as a screening index for PA from  
 535 EH (A) and APA from EH (B), respectively.  $ARR_{ARC}$  indicates aldosterone-over-renin concentration  
 536 ratio; PA, primary aldosteronism; EH, essential hypertension; APA, aldosterone-producing adenoma.
